# Supplementary material for: Bendamustine–rituximab elicits dual tumoricidal and immunomodulatory responses via cGAS–STING activation in diffuse large B-cell lymphoma
Source: HighWire-hosted journal article supplement (doi:10.1136/jitc-2024-009212), 2024-11-01
Supplement: jitc-2024-009212supp001_data_supplement.pdf [file jitc-2024-009212supp001_data_supplement.pdf]

Supplemental Table 1 Patients’ clinical information

| No | Age | Diagnose                  | Left ventricular<br>ejection fraction<br>(LVEF) | Pro-BNP<br>(pg/ml) | Complication                                        |
|----|-----|---------------------------|-------------------------------------------------|--------------------|-----------------------------------------------------|
| 1  | >80 | DLBCL (GCB) -IV A         | 42%                                             | 5607.00            | Chronic heart failure                               |
| 2  | >65 | DLBCL (ABC) -IV B relapse | 50%                                             | 4256.00            | Chronic cardiac insufficiency after<br>chemotherapy |
| 3  | >65 | DLBCL (GCB) -II A         | 43%                                             | 1407.00            | Chronic heart failure, arrhythmia                   |

Supplemental Table 2 Genesets used for ssGSEA

| Geneset    | Gene                                                                                                                                                 |
|------------|------------------------------------------------------------------------------------------------------------------------------------------------------|
| cGAS_STING | CGAS TMEM173 IRF1 IRF5 IRF7 ISG15 USP18 IFNB1 OAS1 OASL TLR4 IFI6 IFI35 IFI44 IFIT1 IFIT2 IFIT3 IFITM1 IFITM2                                        |
| Pyroptosis | IRF1 ZBP1 NLRP1 GSDMD CASP1 AIM2 NLRP3 NLRP6 IL18 NLRC4 CASP6 DHX9 GSDME CASP3 CASP8 TP63 IRF2 CASP5 PYCARD CASP4 BAX DPP9 TP53 IL1A MEFV BAK1 GSDMA |

Supplemental Table 3 Geneset targeted by BR

| Subtype             | Gene                  |
|---------------------|-----------------------|
| cGAS_STING          | CGAS TMEM173 (STING1) |
| Pyroptosis          | GSDMD CASP1 NLRP1     |
| Inflammatory factor | IFNB1 TNF CXCL10      |
| MHC molecule        | HLA-A HLA-B HLA-C     |

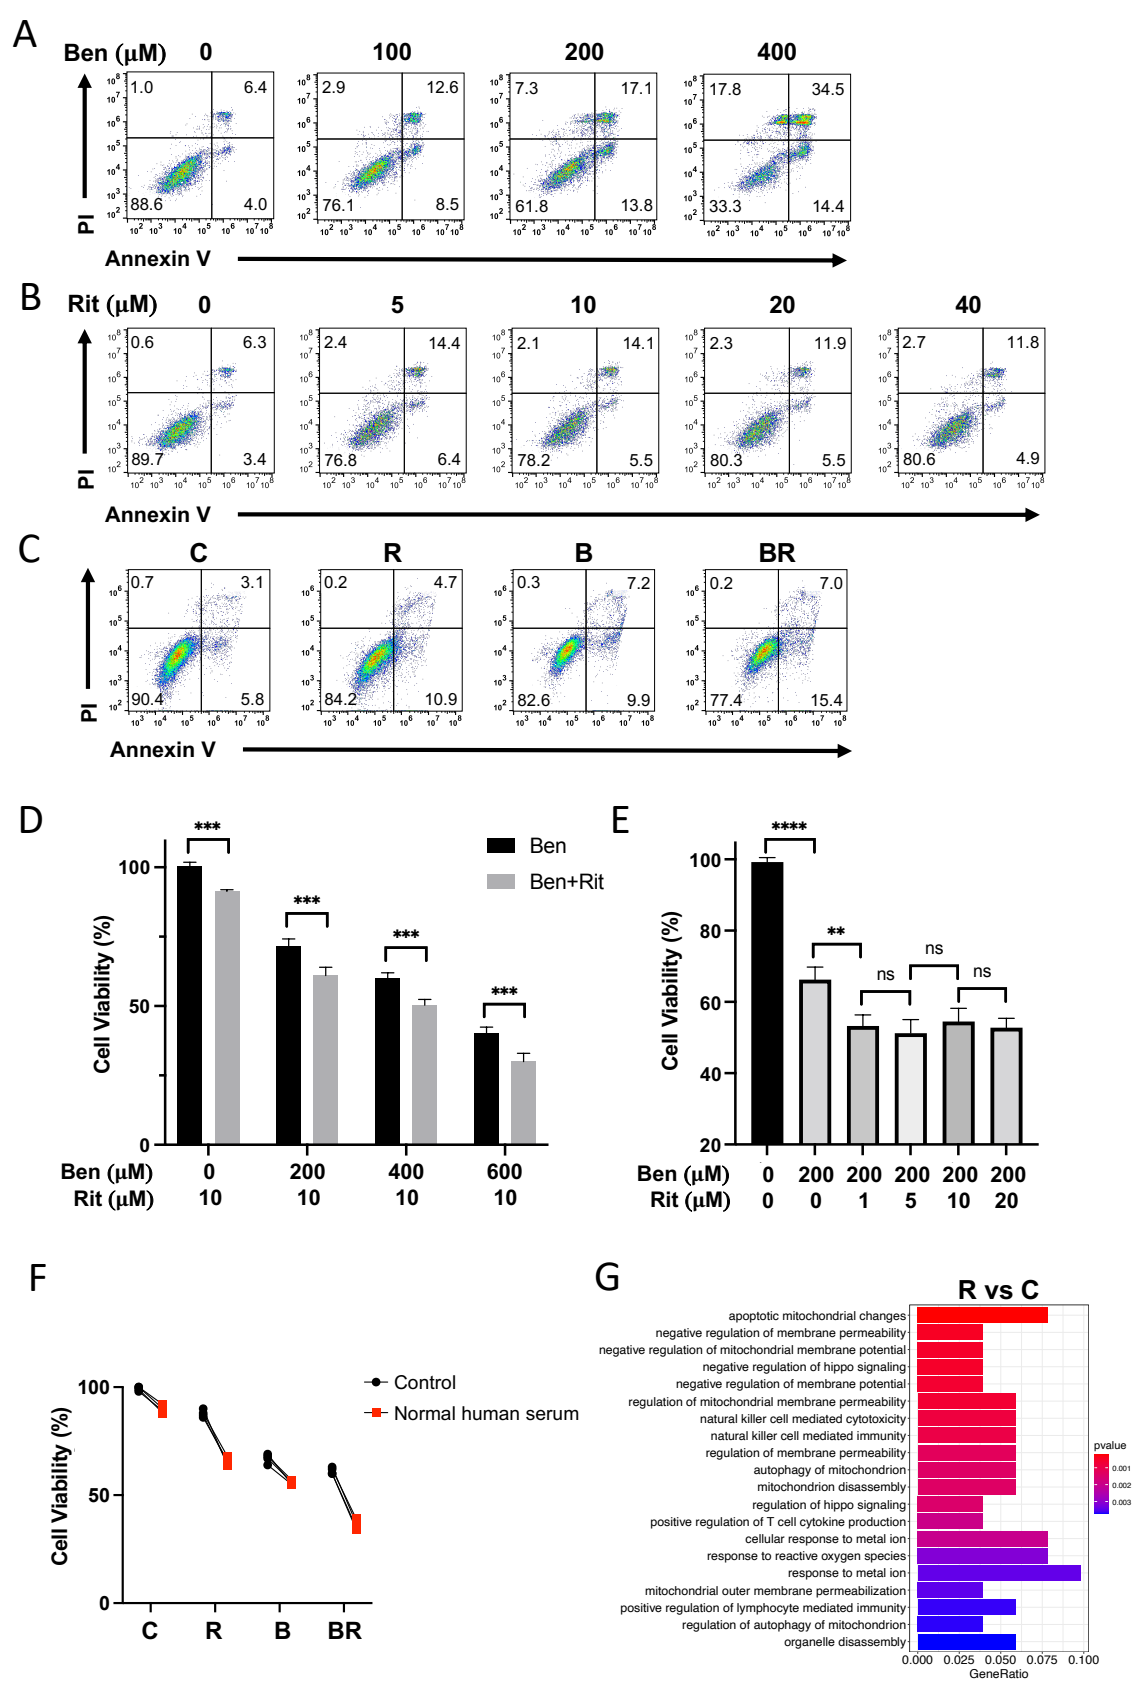

**Figure S1, related to Figure 1. Bendamustine and Rituximab Elicit Cytotoxic Effects on DLBCL Cells In Vitro.**

A, B. Annexin V-PI assay for cell apoptosis. Apoptosis status of SU-DHL2 cell line after treatment with different concentrations of bendamustine (A) or rituximab (B) for 12 hours. C. Annexin V-PI assay for cell apoptosis. Apoptosis status of KARPAS-422 cells after treatment with C, R, B and BR for 12 hours. D, E. Annexin V-PI assay for cell apoptosis. (D) Apoptosis status of OCI-LY1 cells after combined treatment with rituximab at a concentration of 0 or 10  $\mu$ M and different concentrations of bendamustine for 12 hours. (E) Apoptosis status of OCI-LY1 cells after combined treatment with bendamustine at a concentration of 0 or 200  $\mu$ M and different concentrations of rituximab for 12 hours. F. Cell Counting Kit-8 assay for cell viability: Cell viability of OCI-LY1 cells after treatment with or without normal human serum for 36 hours. G. Gene ontology (GO) enrichment analysis of DEG between Rituximab group and control group.

C&CTRL: control group, R&Rit: rituximab group, B&Ben: bendamustine group, BR&Ben+Rit: bendamustine + rituximab. \* $p < 0.05$ ; \*\* $p < 0.01$ ; \*\*\* $p < 0.001$ ; \*\*\*\* $p < 0.0001$

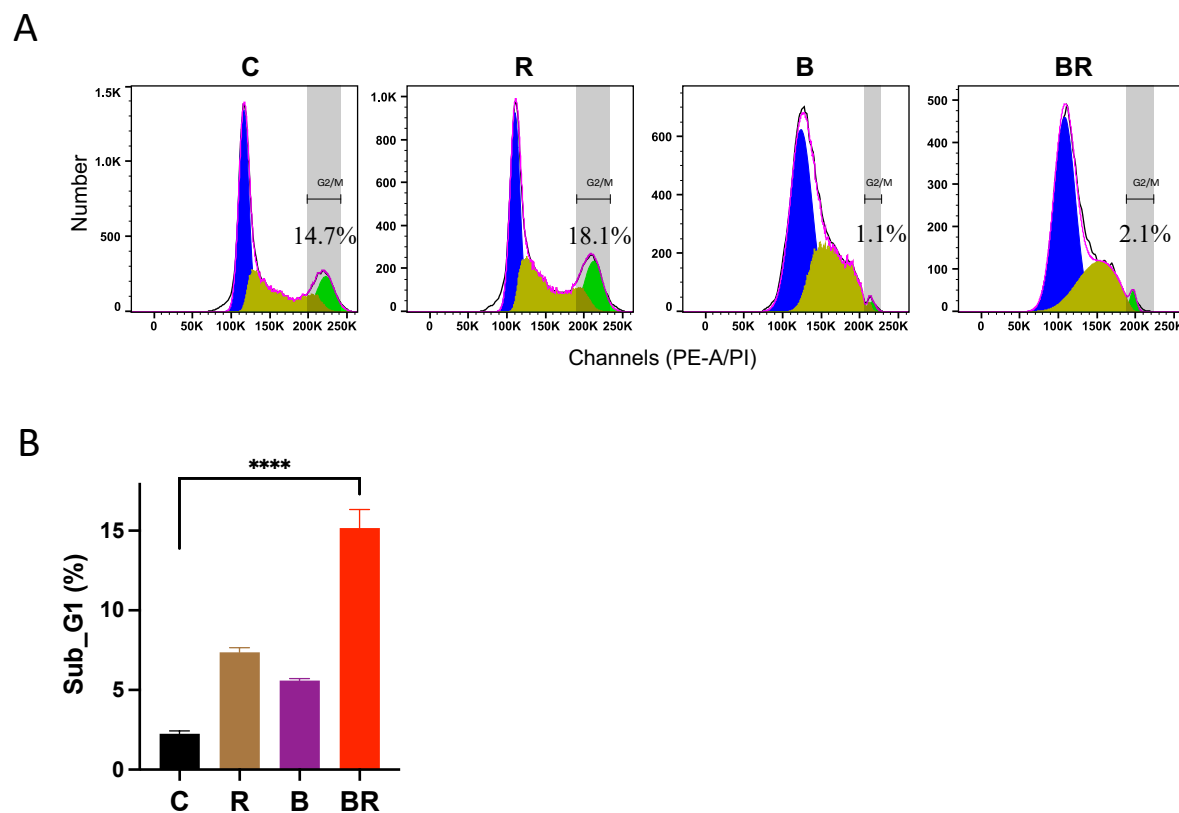

**Figure S2, related to Figure 2. Impact of BR Therapy on Cell Cycle of SU-DHL2 Cells.**

A. PI cell cycle staining: Assessment of cell cycle status in SU-DHL2 cell line after 36 hours of treatment with C, R, B and BR. B. Proportion of SU-DHL2 cells in sub-apoptotic phase after different treatments. C: control group, R: rituximab group, B: bendamustine group, BR: bendamustine + rituximab. \* $p < 0.05$ ; \*\* $p < 0.01$ ; \*\*\* $p < 0.001$ ; \*\*\*\* $p < 0.0001$

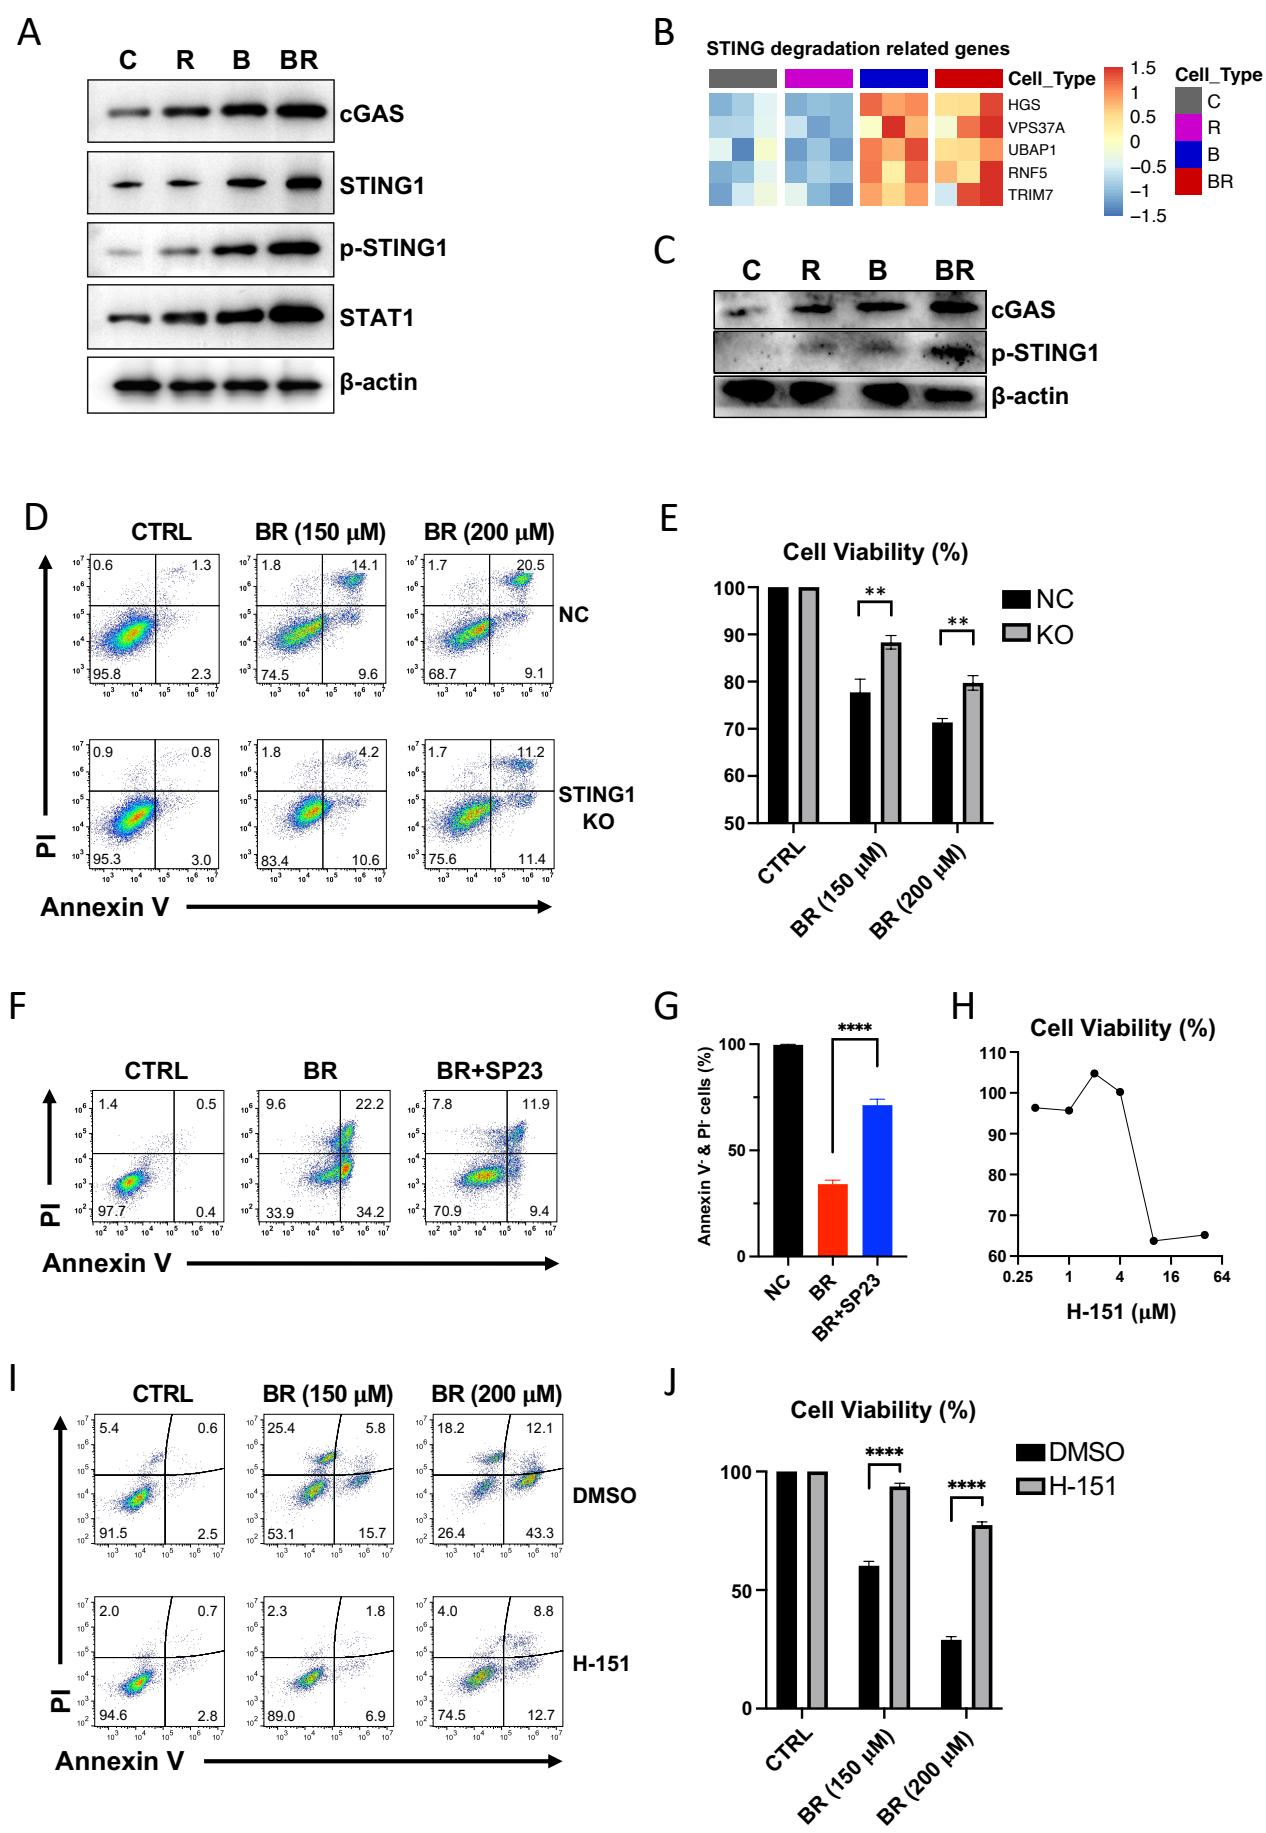

**Fig S3, related to Figure 3. Contribution of cGAS-STING Pathway to Toxicity of BR Therapy.**

A. Western blot analysis of cGAS, STING1, p-STING1, STAT1 expression levels in the OCI-LY1 cells with C, R, B, BR treated for 20 hours.  $\beta$ -actin was used as a control. B. Heatmap shows the variations in genes linked to STING degradation in OCI-LY1 cells given C, R, B, BR treatment. C. Western blot analysis of cGAS and p-STING1 expression levels in the SU-DHL2 cell line.  $\beta$ -actin was used as a control. D, E. Flow cytometry analysis of apoptosis levels in NC SU-DHL2 and STING1 KO SU-DHL2 in different treatment groups (D) and the corresponding statistics (E). F, G. Flow cytometry analysis of apoptosis levels in OCI-LY1 treated with C, BR and BR+SP23 (F) and the corresponding statistics (G). H. Toxicity of different concentrations of H-151 to OCI-LY1 cells. I, J. Flow cytometry analysis of apoptosis levels in DMOS and H-151 treated OCI-LY1 cells in different treatment groups (I) and the corresponding statistics (J). NC: SU-DHL2 with empty vector, STING1 KO: STING1 Knockout SU-DHL2, BR (150  $\mu$ M): Bendamustine 150  $\mu$ M + Rituximab 10  $\mu$ M; BR (200  $\mu$ M): Bendamustine 200  $\mu$ M + Rituximab 10  $\mu$ M, CTRL: untreated, BR: Bendamustine 150  $\mu$ M + Rituximab 10  $\mu$ M, BR+SP23: Bendamustine combined with Rituximab and the STING ubiquitin E3 ligase inhibitor SP23. C, untreated. R, rituximab monotherapy. B, bendamustine monotherapy. BR, bendamustine plus rituximab combination therapy. \* $p < 0.05$ ; \*\* $p < 0.01$ ; \*\*\* $p < 0.001$ ; \*\*\*\* $p < 0.0001$

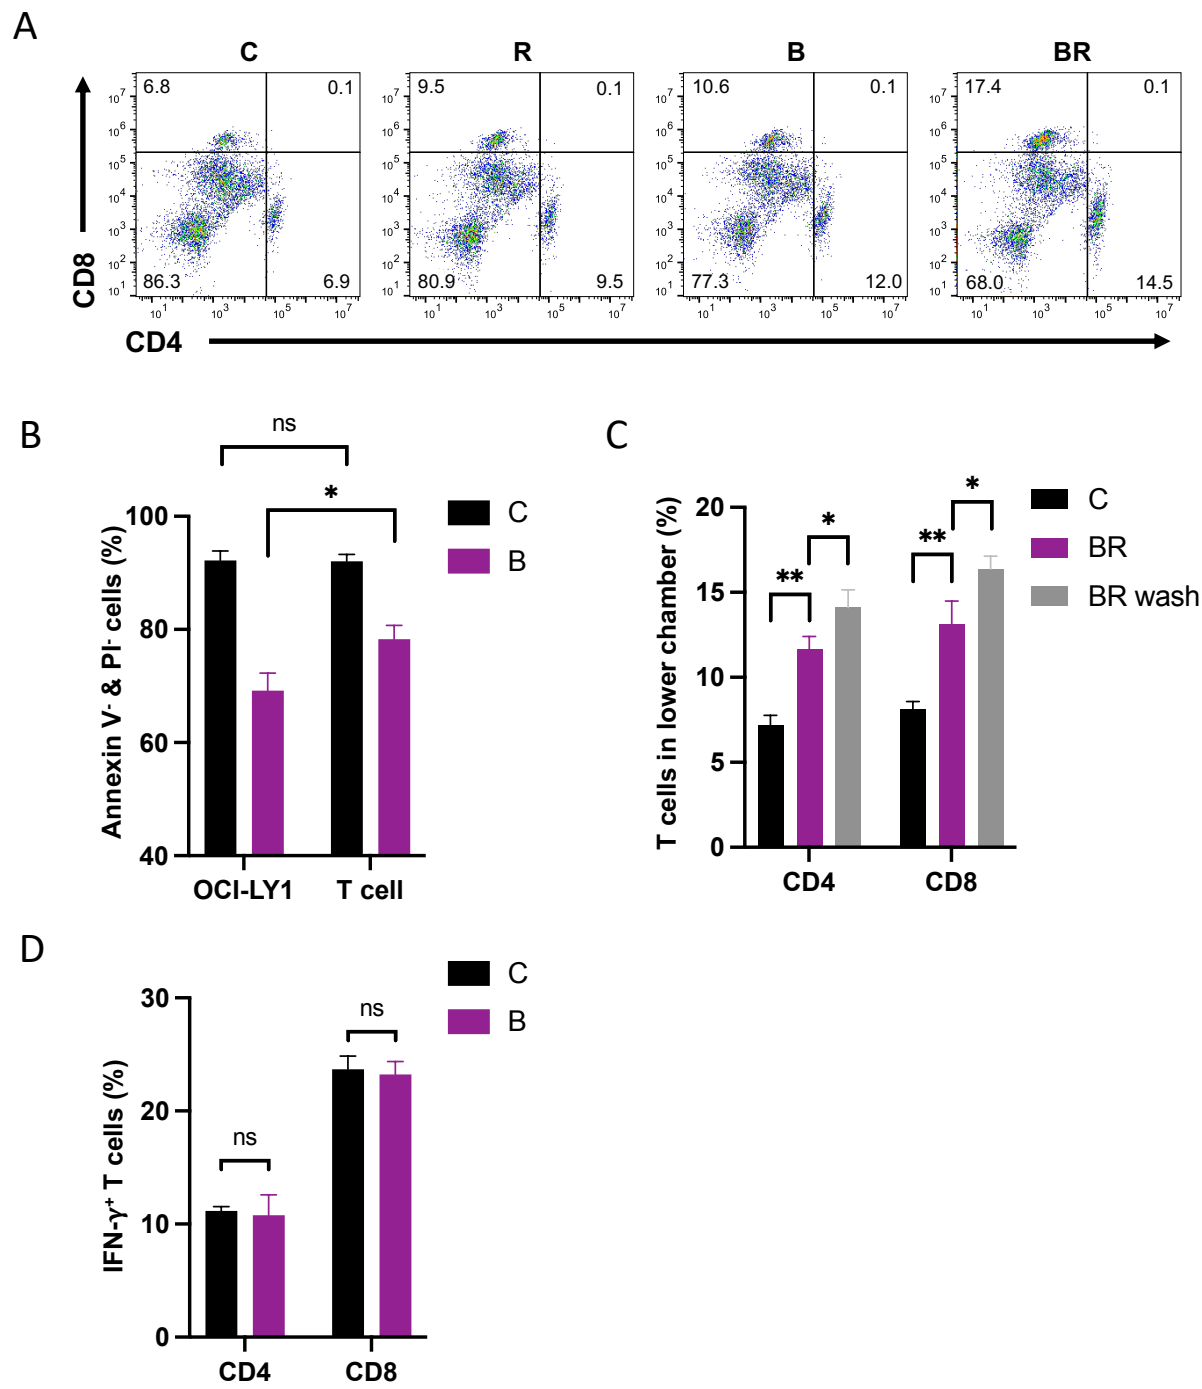

**Fig S4, related to Figure 5, 6. Enhanced T Cell Migration Induced by BR Therapy-Treated Tumor Cells and Direct Impact of BR Therapy on T Cells.**

A. Flow cytometry detected the proportion of CD4<sup>+</sup> and CD8<sup>+</sup> T cells migrating downward in a transwell experiment. KARPAS-422 cells treated with C, R, B and BR as the lower chamber. B. Annexin V-PI assay for cell apoptosis. Apoptosis status of OCI-LY1 cell line and T cell after treatment with bendamustine for 36 hours. C. Flow cytometry detected the proportion of CD4<sup>+</sup> and CD8<sup>+</sup> T cells migrating downward in a transwell experiment. OCI-LY1 cells pretreated with C, BR were seeded to the lower chamber. T cells were seeded into the upper wells. In BR group: BR was added to the medium during transwell assay. In BR wash group: OCI-LY1 cell was washed twice to remove BR and there is no BR in the medium. D. Flow cytometry was used to assess the expression levels of IFN- $\gamma$  in CD4<sup>+</sup> and CD8<sup>+</sup> T cells treated with C or B for 36 hours. Control: control group, Rit: rituximab group, Ben: bendamustine group, Ben+Rit: bendamustine + rituximab. C, untreated. R, rituximab monotherapy. B, bendamustine monotherapy. BR, bendamustine plus rituximab combination therapy. ns: no significant difference, \* $p < 0.05$ ; \*\* $p < 0.01$ ; \*\*\* $p < 0.001$ ; \*\*\*\* $p < 0.0001$



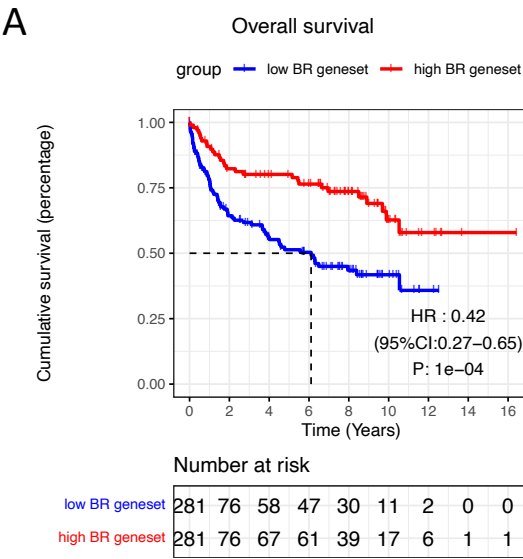

**Fig S5, related to Figure 6. Gene Set Targeted by Bendamustine-Rituximab Therapy Predicts Patient Prognosis.**

A. Kaplan-Meier (KM) survival curve displaying prognosis of high and low score of gene set targeted by BR therapy (Supplemental Table 3). The p-value was generated using the Mantel-Cox log-rank test. HR, hazard ratio.
